# Supplementary material for: Niche and range dynamics of Tasmanian blue gum (Eucalyptus globulus Labill.), a globally cultivated invasive tree
Source: PubMed Central journal article supplement (PMC9482005; doi:10.1002/ece3.9305), 2022-09-17
Supplement: ECE3-12-e9305-s002.pdf [file ECE3-12-e9305-s002.pdf]

S4 Evaluation metrics in the final ecological niche models

S4-1 Evaluation metrics in the final ecological niche models for native Tasmanian blue gum

ANN Testing.data.RUN.PA

|       | RUN1.PA1 | RUN2.PA1 | RUN3.PA1 | RUN4.PA1 | RUN5.PA1 | RUN1.PA2 | RUN2.PA2 | RUN3.PA2 | RUN4.PA2 | RUN5.PA2 | RUN1.PA3 | RUN2.PA3 | RUN3.PA3 | RUN4.PA3 | RUN5.PA3 | RUN1.PA4 | RUN2.PA4 | RUN3.PA4 | RUN4.PA4 | RUN5.PA4 | RUN1.PA5 | RUN2.PA5 | RUN3.PA5 | RUN4.PA5 | RUN5.PA5 |
|-------|----------|----------|----------|----------|----------|----------|----------|----------|----------|----------|----------|----------|----------|----------|----------|----------|----------|----------|----------|----------|----------|----------|----------|----------|----------|
| TSS   | 0.987    | 0.997    | 1        | 0.997    | 0.993    | 1        | 0.993    | 0.993    | 1        | 1        | 0.993    | 0.993    | 0.993    | 1        | 0.997    | 0.993    | 0.993    | 0.997    | 0.987    | 0.985    | 0.997    | 0.973    | 1        | 0.987    | 1        |
| ROC   | 0.996    | 1        | 1        | 1        | 0.998    | 1        | 1        | 0.998    | 1        | 1        | 1        | 1        | 0.998    | 1        | 1        | 0.997    | 0.997    | 0.999    | 0.995    | 0.996    | 1        | 0.999    | 1        | 1        | 1        |
| KAPPA | 0.982    | 0.994    | 1        | 0.994    | 0.988    | 1        | 0.988    | 0.988    | 1        | 1        | 0.988    | 0.988    | 0.988    | 1        | 0.994    | 0.988    | 0.988    | 0.994    | 0.977    | 0.982    | 0.994    | 0.959    | 1        | 0.977    | 1        |

CTA

|       | RUN1.PA1 | RUN2.PA1 | RUN3.PA1 | RUN4.PA1 | RUN5.PA1 | RUN1.PA2 | RUN2.PA2 | RUN3.PA2 | RUN4.PA2 | RUN5.PA2 | RUN1.PA3 | RUN2.PA3 | RUN3.PA3 | RUN4.PA3 | RUN5.PA3 | RUN1.PA4 | RUN2.PA4 | RUN3.PA4 | RUN4.PA4 | RUN5.PA4 | RUN1.PA5 | RUN2.PA5 | RUN3.PA5 | RUN4.PA5 | RUN5.PA5 |
|-------|----------|----------|----------|----------|----------|----------|----------|----------|----------|----------|----------|----------|----------|----------|----------|----------|----------|----------|----------|----------|----------|----------|----------|----------|----------|
| TSS   | 0.982    | 0.997    | 0.958    | 0.98     | 0.98     | 0.982    | 0.987    | 0.99     | 0.971    | 0.987    | 0.99     | 0.982    | 0.988    | 0.993    | 0.99     | 0.965    | 0.983    | 0.987    | 0.978    | 0.997    | 1        | 0.977    | 0.988    | 0.997    | 0.992    |
| ROC   | 0.991    | 0.998    | 0.981    | 0.99     | 0.99     | 0.991    | 0.993    | 0.995    | 0.987    | 0.993    | 0.995    | 0.991    | 0.994    | 0.997    | 0.995    | 0.982    | 0.992    | 0.993    | 0.989    | 0.998    | 1        | 0.988    | 0.994    | 0.998    | 0.996    |
| KAPPA | 0.977    | 0.994    | 0.953    | 0.965    | 0.965    | 0.977    | 0.977    | 0.983    | 0.976    | 0.977    | 0.983    | 0.977    | 0.988    | 0.988    | 0.983    | 0.965    | 0.988    | 0.977    | 0.971    | 0.994    | 1        | 0.977    | 0.988    | 0.994    | 0.994    |

FDA

|       | RUN1.PA1 | RUN2.PA1 | RUN3.PA1 | RUN4.PA1 | RUN5.PA1 | RUN1.PA2 | RUN2.PA2 | RUN3.PA2 | RUN4.PA2 | RUN5.PA2 | RUN1.PA3 | RUN2.PA3 | RUN3.PA3 | RUN4.PA3 | RUN5.PA3 | RUN1.PA4 | RUN2.PA4 | RUN3.PA4 | RUN4.PA4 | RUN5.PA4 | RUN1.PA5 | RUN2.PA5 | RUN3.PA5 | RUN4.PA5 | RUN5.PA5 |
|-------|----------|----------|----------|----------|----------|----------|----------|----------|----------|----------|----------|----------|----------|----------|----------|----------|----------|----------|----------|----------|----------|----------|----------|----------|----------|
| TSS   | 0.99     | 1        | 0.983    | 0.99     | 0.987    | 0.997    | 0.997    | 0.987    | 1        | 1        | 0.993    | 0.993    | 0.993    | 0.997    | 0.987    | 0.99     | 0.997    | 0.997    | 0.99     | 0.993    | 1        | 1        | 0.99     | 0.993    | 1        |
| ROC   | 0.995    | 1        | 0.993    | 0.995    | 0.993    | 0.998    | 0.998    | 0.997    | 1        | 1        | 0.998    | 0.997    | 1        | 0.998    | 0.993    | 0.995    | 0.998    | 0.998    | 0.995    | 0.997    | 1        | 1        | 0.998    | 0.997    | 1        |
| KAPPA | 0.983    | 1        | 0.971    | 0.983    | 0.977    | 0.994    | 0.994    | 0.977    | 1        | 1        | 0.988    | 0.988    | 0.988    | 0.994    | 0.977    | 0.983    | 0.994    | 0.994    | 0.983    | 0.988    | 1        | 1        | 0.983    | 0.988    | 1        |

GBM

|       | RUN1.PA1 | RUN2.PA1 | RUN3.PA1 | RUN4.PA1 | RUN5.PA1 | RUN1.PA2 | RUN2.PA2 | RUN3.PA2 | RUN4.PA2 | RUN5.PA2 | RUN1.PA3 | RUN2.PA3 | RUN3.PA3 | RUN4.PA3 | RUN5.PA3 | RUN1.PA4 | RUN2.PA4 | RUN3.PA4 | RUN4.PA4 | RUN5.PA4 | RUN1.PA5 | RUN2.PA5 | RUN3.PA5 | RUN4.PA5 | RUN5.PA5 |
|-------|----------|----------|----------|----------|----------|----------|----------|----------|----------|----------|----------|----------|----------|----------|----------|----------|----------|----------|----------|----------|----------|----------|----------|----------|----------|
| TSS   | 0.99     | 1        | 0.961    | 0.993    | 0.99     | 0.987    | 0.993    | 0.99     | 0.997    | 0.993    | 0.997    | 0.99     | 0.997    | 0.997    | 0.997    | 0.968    | 1        | 0.997    | 0.99     | 0.997    | 1        | 0.993    | 0.993    | 0.997    | 0.993    |
| ROC   | 0.995    | 1        | 0.997    | 1        | 1        | 0.998    | 1        | 1        | 1        | 1        | 1        | 1        | 1        | 1        | 1        | 0.998    | 1        | 1        | 0.998    | 1        | 1        | 1        | 0.998    | 0.998    | 1        |
| KAPPA | 0.983    | 1        | 0.959    | 0.988    | 0.983    | 0.977    | 0.988    | 0.983    | 0.994    | 0.988    | 0.994    | 0.983    | 0.994    | 0.994    | 0.994    | 0.971    | 1        | 0.994    | 0.983    | 0.994    | 1        | 0.988    | 0.988    | 0.994    | 0.994    |

GLM

|       | RUN1.PA1 | RUN2.PA1 | RUN3.PA1 | RUN4.PA1 | RUN5.PA1 | RUN1.PA2 | RUN2.PA2 | RUN3.PA2 | RUN4.PA2 | RUN5.PA2 | RUN1.PA3 | RUN2.PA3 | RUN3.PA3 | RUN4.PA3 | RUN5.PA3 | RUN1.PA4 | RUN2.PA4 | RUN3.PA4 | RUN4.PA4 | RUN5.PA4 | RUN1.PA5 | RUN2.PA5 | RUN3.PA5 | RUN4.PA5 | RUN5.PA5 |
|-------|----------|----------|----------|----------|----------|----------|----------|----------|----------|----------|----------|----------|----------|----------|----------|----------|----------|----------|----------|----------|----------|----------|----------|----------|----------|
| TSS   | 0.993    | 1        | 0.993    | 0.993    | 0.997    | 0.997    | 0.99     | 0.993    | 0.943    | 0.983    | 1        | 0.997    | 1        | 1        | 0.983    | 0.99     | 0.997    | 0.987    | 0.993    | 0.953    | 0.997    | 0.997    | 0.99     | 0.987    | 0.993    |
| ROC   | 0.997    | 1        | 0.997    | 0.997    | 0.998    | 0.998    | 0.995    | 0.997    | 0.972    | 0.992    | 1        | 0.998    | 1        | 1        | 0.993    | 0.995    | 0.998    | 0.993    | 0.997    | 0.977    | 0.998    | 0.998    | 0.995    | 0.993    | 0.997    |
| KAPPA | 0.988    | 1        | 0.988    | 0.988    | 0.994    | 0.994    | 0.983    | 0.988    | 0.92     | 0.971    | 1        | 0.994    | 1        | 1        | 0.971    | 0.983    | 0.994    | 0.977    | 0.988    | 0.953    | 0.994    | 0.994    | 0.983    | 0.977    | 0.988    |

.MAXENT.Phillips

|       | RUN1.PA1 | RUN2.PA1 | RUN3.PA1 | RUN4.PA1 | RUN5.PA1 | RUN1.PA2 | RUN2.PA2 | RUN3.PA2 | RUN4.PA2 | RUN5.PA2 | RUN1.PA3 | RUN2.PA3 | RUN3.PA3 | RUN4.PA3 | RUN5.PA3 | RUN1.PA4 | RUN2.PA4 | RUN3.PA4 | RUN4.PA4 | RUN5.PA4 | RUN1.PA5 | RUN2.PA5 | RUN3.PA5 | RUN4.PA5 | RUN5.PA5 |
|-------|----------|----------|----------|----------|----------|----------|----------|----------|----------|----------|----------|----------|----------|----------|----------|----------|----------|----------|----------|----------|----------|----------|----------|----------|----------|
| TSS   | 0.953    | 0.982    | 0.983    | 0.955    | 0.958    | 0.967    | 0.978    | 0.977    | 0.978    | 0.945    | 0.963    | 0.98     | 0.985    | 0.993    | 0.987    | 0.963    | 0.98     | 0.983    | 0.97     | 0.96     | 1        | 0.977    | 0.963    | 0.987    | 0.993    |
| ROC   | 0.978    | 0.996    | 0.992    | 0.977    | 0.979    | 0.982    | 0.989    | 0.988    | 0.988    | 0.969    | 0.982    | 0.99     | 0.997    | 0.997    | 0.993    | 0.982    | 0.998    | 0.992    | 0.985    | 0.98     | 1        | 0.988    | 0.982    | 0.993    | 0.997    |
| KAPPA | 0.937    | 0.977    | 0.971    | 0.931    | 0.937    | 0.959    | 0.971    | 0.96     | 0.971    | 0.947    | 0.937    | 0.965    | 0.982    | 0.988    | 0.977    | 0.937    | 0.982    | 0.971    | 0.948    | 0.932    | 1        | 0.96     | 0.937    | 0.977    | 0.988    |

RF

|       | RUN1.PA1 | RUN2.PA1 | RUN3.PA1 | RUN4.PA1 | RUN5.PA1 | RUN1.PA2 | RUN2.PA2 | RUN3.PA2 | RUN4.PA2 | RUN5.PA2 | RUN1.PA3 | RUN2.PA3 | RUN3.PA3 | RUN4.PA3 | RUN5.PA3 | RUN1.PA4 | RUN2.PA4 | RUN3.PA4 | RUN4.PA4 | RUN5.PA4 | RUN1.PA5 | RUN2.PA5 | RUN3.PA5 | RUN4.PA5 | RUN5.PA5 |
|-------|----------|----------|----------|----------|----------|----------|----------|----------|----------|----------|----------|----------|----------|----------|----------|----------|----------|----------|----------|----------|----------|----------|----------|----------|----------|
| TSS   | 0.99     | 1        | 0.99     | 1        | 0.993    | 1        | 1        | 1        | 1        | 1        | 1        | 0.99     | 1        | 1        | 1        | 0.997    | 1        | 1        | 0.997    | 1        | 1        | 0.997    | 0.997    | 1        | 1        |
| ROC   | 1        | 1        | 1        | 1        | 1        | 1        | 1        | 1        | 1        | 1        | 1        | 1        | 1        | 1        | 1        | 1        | 1        | 1        | 1        | 1        | 1        | 1        | 1        | 1        | 1        |
| KAPPA | 0.988    | 1        | 0.983    | 1        | 0.988    | 1        | 1        | 1        | 1        | 1        | 1        | 0.988    | 1        | 1        | 1        | 0.994    | 1        | 1        | 0.994    | 1        | 1        | 0.994    | 0.994    | 1        | 1        |

S4-2 Evaluation metrics in the final ecological niche models for introduced Tasmanian blue gum

| ANN              | Testing.data.RUN.PA |           |          |          |          |          |          |          |          |          |          |          |          |          |          |          |          |          |          |          |          |          |          |          |          |
|------------------|---------------------|-----------|----------|----------|----------|----------|----------|----------|----------|----------|----------|----------|----------|----------|----------|----------|----------|----------|----------|----------|----------|----------|----------|----------|----------|
|                  | RUN1.PA1            | .RUN2.PA1 | RUN3.PA1 | RUN4.PA1 | RUN5.PA1 | RUN1.PA2 | RUN2.PA2 | RUN3.PA2 | RUN4.PA2 | RUN5.PA2 | RUN1.PA3 | RUN2.PA3 | RUN3.PA3 | RUN4.PA3 | RUN5.PA3 | RUN1.PA4 | RUN2.PA4 | RUN3.PA4 | RUN4.PA4 | RUN5.PA4 | RUN1.PA5 | RUN2.PA5 | RUN3.PA5 | RUN4.PA5 | RUN5.PA5 |
| TSS              | 0.895               | 0.895     | 0.831    | 0.82     | 0.753    | 0.841    | 0.825    | 0.833    | 0.801    | 0.837    | 0.844    | 0.833    | 0.821    | 0.856    | 0.856    | 0.861    | 0.813    | 0.85     | 0.794    | 0.799    | 0.82     | 0.802    | 0.856    | 0.82     | 0.848    |
| ROC              | 0.98                | 0.981     | 0.958    | 0.922    | 0.916    | 0.956    | 0.948    | 0.931    | 0.946    | 0.954    | 0.965    | 0.955    | 0.949    | 0.943    | 0.955    | 0.976    | 0.951    | 0.951    | 0.92     | 0.939    | 0.961    | 0.954    | 0.956    | 0.949    | 0.95     |
| KAPPA            | 0.895               | 0.895     | 0.831    | 0.82     | 0.753    | 0.841    | 0.825    | 0.833    | 0.801    | 0.837    | 0.844    | 0.833    | 0.821    | 0.856    | 0.856    | 0.861    | 0.813    | 0.85     | 0.794    | 0.799    | 0.82     | 0.802    | 0.856    | 0.82     | 0.848    |
| CTA              |                     |           |          |          |          |          |          |          |          |          |          |          |          |          |          |          |          |          |          |          |          |          |          |          |          |
|                  | RUN1.PA1            | .RUN2.PA1 | RUN3.PA1 | RUN4.PA1 | RUN5.PA1 | RUN1.PA2 | RUN2.PA2 | RUN3.PA2 | RUN4.PA2 | RUN5.PA2 | RUN1.PA3 | RUN2.PA3 | RUN3.PA3 | RUN4.PA3 | RUN5.PA3 | RUN1.PA4 | RUN2.PA4 | RUN3.PA4 | RUN4.PA4 | RUN5.PA4 | RUN1.PA5 | RUN2.PA5 | RUN3.PA5 | RUN4.PA5 | RUN5.PA5 |
| TSS              | 0.893               | 0.888     | 0.885    | 0.884    | 0.869    | 0.879    | 0.876    | 0.863    | 0.893    | 0.887    | 0.866    | 0.856    | 0.86     | 0.898    | 0.868    | 0.858    | 0.884    | 0.892    | 0.877    | 0.877    | 0.888    | 0.869    | 0.882    | 0.871    | 0.874    |
| ROC              | 0.966               | 0.969     | 0.965    | 0.961    | 0.966    | 0.959    | 0.957    | 0.96     | 0.967    | 0.969    | 0.954    | 0.966    | 0.965    | 0.971    | 0.963    | 0.953    | 0.968    | 0.968    | 0.96     | 0.965    | 0.979    | 0.956    | 0.967    | 0.952    | 0.961    |
| KAPPA            | 0.893               | 0.888     | 0.885    | 0.884    | 0.869    | 0.879    | 0.876    | 0.863    | 0.893    | 0.887    | 0.866    | 0.856    | 0.86     | 0.898    | 0.868    | 0.858    | 0.884    | 0.892    | 0.877    | 0.877    | 0.888    | 0.869    | 0.882    | 0.871    | 0.874    |
| FDA              |                     |           |          |          |          |          |          |          |          |          |          |          |          |          |          |          |          |          |          |          |          |          |          |          |          |
|                  | RUN1.PA1            | .RUN2.PA1 | RUN3.PA1 | RUN4.PA1 | RUN5.PA1 | RUN1.PA2 | RUN2.PA2 | RUN3.PA2 | RUN4.PA2 | RUN5.PA2 | RUN1.PA3 | RUN2.PA3 | RUN3.PA3 | RUN4.PA3 | RUN5.PA3 | RUN1.PA4 | RUN2.PA4 | RUN3.PA4 | RUN4.PA4 | RUN5.PA4 | RUN1.PA5 | RUN2.PA5 | RUN3.PA5 | RUN4.PA5 | RUN5.PA5 |
| TSS              | 0.879               | 0.888     | 0.89     | 0.879    | 0.876    | 0.896    | 0.868    | 0.876    | 0.887    | 0.893    | 0.866    | 0.871    | 0.868    | 0.89     | 0.88     | 0.86     | 0.866    | 0.871    | 0.871    | 0.864    | 0.887    | 0.868    | 0.877    | 0.861    | 0.88     |
| ROC              | 0.973               | 0.979     | 0.981    | 0.97     | 0.969    | 0.979    | 0.97     | 0.975    | 0.976    | 0.979    | 0.974    | 0.975    | 0.978    | 0.984    | 0.976    | 0.972    | 0.976    | 0.98     | 0.977    | 0.977    | 0.98     | 0.977    | 0.976    | 0.968    | 0.977    |
| KAPPA            | 0.879               | 0.888     | 0.89     | 0.879    | 0.876    | 0.896    | 0.868    | 0.876    | 0.887    | 0.893    | 0.866    | 0.871    | 0.868    | 0.89     | 0.88     | 0.86     | 0.866    | 0.871    | 0.871    | 0.864    | 0.887    | 0.868    | 0.877    | 0.861    | 0.88     |
| GBM              |                     |           |          |          |          |          |          |          |          |          |          |          |          |          |          |          |          |          |          |          |          |          |          |          |          |
|                  | RUN1.PA1            | .RUN2.PA1 | RUN3.PA1 | RUN4.PA1 | RUN5.PA1 | RUN1.PA2 | RUN2.PA2 | RUN3.PA2 | RUN4.PA2 | RUN5.PA2 | RUN1.PA3 | RUN2.PA3 | RUN3.PA3 | RUN4.PA3 | RUN5.PA3 | RUN1.PA4 | RUN2.PA4 | RUN3.PA4 | RUN4.PA4 | RUN5.PA4 | RUN1.PA5 | RUN2.PA5 | RUN3.PA5 | RUN4.PA5 | RUN5.PA5 |
| TSS              | 0.896               | 0.895     | 0.885    | 0.888    | 0.882    | 0.912    | 0.885    | 0.892    | 0.901    | 0.904    | 0.885    | 0.882    | 0.887    | 0.907    | 0.9      | 0.882    | 0.885    | 0.9      | 0.885    | 0.879    | 0.901    | 0.872    | 0.9      | 0.88     | 0.89     |
| ROC              | 0.986               | 0.988     | 0.986    | 0.982    | 0.982    | 0.985    | 0.981    | 0.984    | 0.983    | 0.988    | 0.98     | 0.983    | 0.984    | 0.989    | 0.985    | 0.985    | 0.985    | 0.989    | 0.986    | 0.986    | 0.987    | 0.984    | 0.982    | 0.981    | 0.984    |
| KAPPA            | 0.896               | 0.895     | 0.885    | 0.888    | 0.882    | 0.912    | 0.885    | 0.892    | 0.901    | 0.904    | 0.885    | 0.882    | 0.887    | 0.907    | 0.9      | 0.882    | 0.885    | 0.9      | 0.885    | 0.879    | 0.901    | 0.872    | 0.9      | 0.88     | 0.89     |
| GLM              |                     |           |          |          |          |          |          |          |          |          |          |          |          |          |          |          |          |          |          |          |          |          |          |          |          |
|                  | RUN1.PA1            | .RUN2.PA1 | RUN3.PA1 | RUN4.PA1 | RUN5.PA1 | RUN1.PA2 | RUN2.PA2 | RUN3.PA2 | RUN4.PA2 | RUN5.PA2 | RUN1.PA3 | RUN2.PA3 | RUN3.PA3 | RUN4.PA3 | RUN5.PA3 | RUN1.PA4 | RUN2.PA4 | RUN3.PA4 | RUN4.PA4 | RUN5.PA4 | RUN1.PA5 | RUN2.PA5 | RUN3.PA5 | RUN4.PA5 | RUN5.PA5 |
| TSS              | 0.893               | 0.9       | 0.893    | 0.882    | 0.876    | 0.887    | 0.868    | 0.872    | 0.893    | 0.895    | 0.869    | 0.885    | 0.893    | 0.895    | 0.895    | 0.871    | 0.876    | 0.876    | 0.869    | 0.874    | 0.896    | 0.876    | 0.877    | 0.871    | 0.898    |
| ROC              | 0.98                | 0.985     | 0.984    | 0.978    | 0.977    | 0.98     | 0.972    | 0.981    | 0.98     | 0.984    | 0.976    | 0.977    | 0.979    | 0.984    | 0.979    | 0.977    | 0.98     | 0.983    | 0.981    | 0.98     | 0.985    | 0.978    | 0.98     | 0.974    | 0.979    |
| KAPPA            | 0.893               | 0.9       | 0.893    | 0.882    | 0.876    | 0.887    | 0.868    | 0.872    | 0.893    | 0.895    | 0.869    | 0.885    | 0.893    | 0.895    | 0.895    | 0.871    | 0.876    | 0.876    | 0.869    | 0.874    | 0.896    | 0.876    | 0.877    | 0.871    | 0.898    |
| .MAXENT.Phillips |                     |           |          |          |          |          |          |          |          |          |          |          |          |          |          |          |          |          |          |          |          |          |          |          |          |
|                  | RUN1.PA1            | .RUN2.PA1 | RUN3.PA1 | RUN4.PA1 | RUN5.PA1 | RUN1.PA2 | RUN2.PA2 | RUN3.PA2 | RUN4.PA2 | RUN5.PA2 | RUN1.PA3 | RUN2.PA3 | RUN3.PA3 | RUN4.PA3 | RUN5.PA3 | RUN1.PA4 | RUN2.PA4 | RUN3.PA4 | RUN4.PA4 | RUN5.PA4 | RUN1.PA5 | RUN2.PA5 | RUN3.PA5 | RUN4.PA5 | RUN5.PA5 |
| TSS              | 0.81                | 0.853     | 0.828    | 0.781    | 0.788    | 0.848    | 0.839    | 0.812    | 0.839    | 0.836    | 0.815    | 0.812    | 0.809    | 0.86     | 0.815    | 0.799    | 0.804    | 0.794    | 0.772    | 0.785    | 0.852    | 0.772    | 0.775    | 0.78     | 0.785    |
| ROC              | 0.91                | 0.935     | 0.925    | 0.897    | 0.896    | 0.931    | 0.922    | 0.913    | 0.924    | 0.926    | 0.916    | 0.914    | 0.909    | 0.941    | 0.918    | 0.902    | 0.908    | 0.9      | 0.891    | 0.899    | 0.965    | 0.894    | 0.901    | 0.903    | 0.907    |
| KAPPA            | 0.81                | 0.853     | 0.828    | 0.781    | 0.788    | 0.848    | 0.839    | 0.812    | 0.839    | 0.836    | 0.815    | 0.812    | 0.809    | 0.86     | 0.815    | 0.799    | 0.804    | 0.794    | 0.772    | 0.785    | 0.852    | 0.772    | 0.775    | 0.78     | 0.785    |
| RF               |                     |           |          |          |          |          |          |          |          |          |          |          |          |          |          |          |          |          |          |          |          |          |          |          |          |
|                  | RUN1.PA1            | .RUN2.PA1 | RUN3.PA1 | RUN4.PA1 | RUN5.PA1 | RUN1.PA2 | RUN2.PA2 | RUN3.PA2 | RUN4.PA2 | RUN5.PA2 | RUN1.PA3 | RUN2.PA3 | RUN3.PA3 | RUN4.PA3 | RUN5.PA3 | RUN1.PA4 | RUN2.PA4 | RUN3.PA4 | RUN4.PA4 | RUN5.PA4 | RUN1.PA5 | RUN2.PA5 | RUN3.PA5 | RUN4.PA5 | RUN5.PA5 |
| TSS              | 0.912               | 0.919     | 0.914    | 0.903    | 0.903    | 0.912    | 0.896    | 0.895    | 0.912    | 0.915    | 0.888    | 0.89     | 0.903    | 0.92     | 0.914    | 0.895    | 0.909    | 0.903    | 0.906    | 0.909    | 0.914    | 0.892    | 0.917    | 0.888    | 0.901    |
| ROC              | 0.991               | 0.991     | 0.991    | 0.986    | 0.986    | 0.99     | 0.985    | 0.989    | 0.989    | 0.992    | 0.986    | 0.986    | 0.989    | 0.991    | 0.988    | 0.986    | 0.991    | 0.991    | 0.99     | 0.991    | 0.988    | 0.986    | 0.987    | 0.984    | 0.986    |
| KAPPA            | 0.912               | 0.919     | 0.914    | 0.903    | 0.903    | 0.912    | 0.896    | 0.895    | 0.912    | 0.915    | 0.888    | 0.89     | 0.903    | 0.92     | 0.914    | 0.895    | 0.909    | 0.903    | 0.906    | 0.909    | 0.914    | 0.892    | 0.917    | 0.888    | 0.901    |
